# Supplementary material
Source: PubMed Central journal article supplement (PMC3781372)
Supplement: supp_113.052647_Supplemental_Table_5_52647.pdf [file supp_113.052647_Supplemental_Table_5_52647.pdf]

MULTISPECIFIC DRUG TRANSPORTER *Slc22a8* (*Oat3*) REGULATES MULTIPLE METABOLIC AND SIGNALING PATHWAYS. Wei Wu, Neema Jamshidi, Satish A. Eraly, Henry C. Liu, Kevin T. Bush, Bernhard O. Palsson, and Sanjay K. Nigam. Drug Metabolism and Disposition.

**Supplemental Table 5. List of some significantly altered Mass-spect features in the plasma of *Oat3* deficient mice.**

| Feature                                           | Fold change | p-value | m/z      | Ret. time | Molecule                                                                |
|---------------------------------------------------|-------------|---------|----------|-----------|-------------------------------------------------------------------------|
| M441T11_1                                         | 8.3         | 0.0325  | 441.1205 | 11.27     | <b>Pongamoside A</b>                                                    |
| M174T10_2                                         | 7.2         | 0.0218  | 174.1496 | 10.07     | <b>9-amino-nonanoic acid</b>                                            |
| M310T13_1                                         | 6.9         | 0.0012  | 310.1137 | 12.77     | <b>9-O-Acetylneuraminic acid</b>                                        |
| M457T11_1                                         | 6.5         | 0.0081  | 457.0867 | 11.25     | <b>2-Amino-3-hydroxy-5-nitrobenzophenone glucuronide</b>                |
| M454T13_1                                         | 4.6         | 7E-05   | 454.1812 | 13.25     | <b>7-Hydroxyfluphenazine</b>                                            |
| M175T3_2                                          | 3.9         | 3E-05   | 175.0242 | 2.62      | <b>Dehydroascorbic acid</b>                                             |
| M531T11                                           | 3.5         | 0.0042  | 531.0891 | 11.24     | <b>Fluorescein monoglucuronide</b>                                      |
| M241T9                                            | 3.5         | 0.0102  | 241.0885 | 9.35      | <b>2-Oxo-9-methylthiononanoic acid</b>                                  |
| M320T10_1                                         | 2.7         | 0.0099  | 320.0954 | 9.84      | <b>1-Methylguanosine</b>                                                |
| M477T16                                           | 2.3         | 0.0211  | 477.1686 | 16.43     | <b>3-Hydroxypromazine glucuronide</b>                                   |
| M342T2_6                                          | 2.2         | 0.0202  | 342.2013 | 1.63      | <b>Dihydrotetrabenazine</b>                                             |
| M637T19_2                                         | 2.0         | 0.0351  | 636.6307 | 18.64     | <b>Tricosanamide</b>                                                    |
| M320T16                                           | 2.0         | 0.0189  | 320.1871 | 15.65     | <b>Chloroquine</b>                                                      |
| M286T2_7                                          | 2.1         | 0.0118  | 286.1598 | 1.53      | <b>N-Tritylaziridine</b>                                                |
| M529T3_4                                          | 2.1         | 0.0081  | 529.282  | 2.88      | <b>3<math>\beta</math>-ACETOXYDEOXODIHYDROGEDUNIN</b>                   |
| M281T16_1                                         | 2.1         | 0.0229  | 281.1422 | 16.18     | <b>N-HISTIDYL-2-AMINONAPHTHALENE (<math>\beta</math>NA)</b>             |
| M302T2_4                                          | 2.2         | 0.0218  | 302.124  | 2.12      | <b>Desmethylondansetron</b>                                             |
| M659T3                                            | 2.2         | 0.0315  | 659.002  | 2.63      | <b>Isoscutellarein 4'-methyl ether 8-(2'',4''-disulfatoglucuronide)</b> |
| M238T4                                            | 2.3         | 0.0434  | 238.0716 | 4.29      | <b>KINETIN</b>                                                          |
| M285T2_4                                          | 2.3         | 0.0039  | 285.1572 | 1.53      | <b>Tropicamide</b>                                                      |
| M300T13_2                                         | 2.3         | 0.042   | 300.1496 | 12.79     | <b>Metochlopramide</b>                                                  |
| M230T11_4                                         | 2.4         | 0.0259  | 230.0808 | 11.33     | <b>FENAMISAL</b>                                                        |
| M230T2_3                                          | 2.4         | 0.0092  | 230.0985 | 2.12      | <b>MIGLITO</b>                                                          |
| M545T3_2                                          | 2.5         | 0.0001  | 545.1329 | 2.74      | <b>CAY10406</b>                                                         |
| M252T2_4                                          | 2.5         | 0.031   | 252.0802 | 2.11      | <b>H-9</b>                                                              |
| M415T14_3                                         | 2.7         | 0.0025  | 415.3282 | 13.76     | <b>Palmitoyl Serotonin</b>                                              |
| M366T18_1                                         | 3.3         | 0.0336  | 366.3408 | 17.65     | <b>Behenic acid(d3)</b>                                                 |
| M195T14                                           | 4.7         | 0.0005  | 195.0385 | 14.4      | <b>Hydantoin-5-propionic acid</b>                                       |
| M366T17                                           | 10.9        | 8E-05   | 366.3406 | 17.28     | <b>Behenic acid(d3)</b>                                                 |
| M366T18_2                                         | 18.6        | 0.001   | 366.3404 | 17.88     | <b>Behenic acid(d3)</b>                                                 |
| Note: Up or Down in <i>Oat3</i> deficient plasma. |             |         |          |           |                                                                         |
