# Supplementary material
Source: PubMed Central journal article supplement (PMC3781372)
Supplement: supp_113.052647_Supplementary_tables_1_52647.pdf [file supp_113.052647_Supplementary_tables_1_52647.pdf]

Supplemental Table 1. Unique\_changes\_WT\_KO

| Reaction           | Span       | WT vs KO  | Name                                 | Equation      | Subsystem                     |                                            |
|--------------------|------------|-----------|--------------------------------------|---------------|-------------------------------|--------------------------------------------|
| 3MOBt2im           | 500000     | WT Unique | 3-methyl-2-oxobutanoate              | 3mob[c] + h   | Transport, Mitochondrial      |                                            |
| 3MOPt2im           | 500000     | WT Unique | 3-Methyl-2-oxopentanoate             | 3mop[c] + h   | Transport, Mitochondrial      |                                            |
| 4MOPt2im           | 500000     | WT Unique | 4-methyl-2-oxopentanoate             | 4mop[c] + h   | Transport, Mitochondrial      |                                            |
| 4PYRDX             | 1          | WT Unique | 4-Pyridoxal secretion                | 4pyrdx[c] +   | Transport, Extracellular      |                                            |
| ARACHDt2           | 1000000    | WT Unique | fatty acid transport via diarachd[e] | <             | Transport, Extracellular      |                                            |
| ARACHt             | 1000000    | WT Unique | fatty acid transport via diarach[e]  | <=            | Transport, Extracellular      |                                            |
| ATPaseI            | 12.86041   | WT Unique | V-type ATPase, H+ transp             | atp[c] + (3)  | Transport, Lysosomal          |                                            |
| CHOLATe2           | 258.922917 | WT Unique | cholate transport via sod            | cholate[e] +  | Transport, Extracellular      |                                            |
| CHOLATe3           | 258.922917 | WT Unique | ABC bile acid transporter            | atp[c] + cho  | Transport, Extracellular      |                                            |
| DOPAt4(2)r         | 500000     | WT Unique | Dopamine reversible trar             | dopa[e] + (2) | Transport, Extracellular      |                                            |
| EX_4pyrdx(e)       | 1          | WT Unique | 4-Pyridoxate Demand                  |               | Transport                     |                                            |
| EX_ha(e)           | 8.319895   | WT Unique | Hyaluronan Demand                    |               | Transport                     |                                            |
| EX_ha_pre1(e)      | 16.639789  | WT Unique | Hyaluronan biosynthesis, precursor   | 1             | Transport                     |                                            |
| FATP4t             | 1000000    | WT Unique | fatty acid electroneutral            | arach[c] + n  | Transport, Extracellular      |                                            |
| FATP5t             | 1000000    | WT Unique | fatty acid electroneutral            | arachd[c] +   | Transport, Extracellular      |                                            |
| GLCAASE8ly         | 25.72082   | WT Unique | beta-glucuronidase, lyso             | [I] : h2o + h | Hyaluronan Metabolism         |                                            |
| GLCAASE9ly         | 25.72082   | WT Unique | beta-glucuronidase, lyso             | [I] : (2) h2o | Hyaluronan Metabolism         |                                            |
| GLCURtly           | 51.441639  | WT Unique | glucuronate transport int            | glcur[c] + h  | Transport, Lysosomal          |                                            |
| HAS1               | 26.452804  | WT Unique | hyaluronan synthase                  | uacgam[c] +   | Hyaluronan Metabolism         |                                            |
| HAS2               | 25.72082   | WT Unique | hyaluronan synthase                  | ha_pre1[e]    | Hyaluronan Metabolism         |                                            |
| HAtly              | 25.72082   | WT Unique | hyaluronan transport, ex             | ha[e] -->     | ha                            | Transport, Lysosomal                       |
| HMGCOASim          | 293.497396 | WT Unique | Hydroxymethylglutaryl C              | [m] : acoa    | Cholesterol Metabolism        |                                            |
| ILETA              | 500000     | WT Unique | isoleucine transaminase              | [c] : ak      | g + i                         | Valine, Leucine, and Isoleucine Metabolism |
| ILETA <sub>m</sub> | 500000     | WT Unique | isoleucine transaminase,             | [m] : ak      | g + i                         | Valine, Leucine, and Isoleucine Metabolism |
| ILEt5m             | 500000     | WT Unique | Isoleucine mitochondrial             | ile-L[c] <==> | Transport, Mitochondrial      |                                            |
| LEUTA              | 500000     | WT Unique | leucine transaminase                 | [c] : ak      | g + l                         | Valine, Leucine, and Isoleucine Metabolism |
| LEUTA <sub>m</sub> | 500000     | WT Unique | leucine transaminase, mi             | [m] : ak      | g + l                         | Valine, Leucine, and Isoleucine Metabolism |
| LEUt5m             | 500000     | WT Unique | leucine mitochondrial tra            | leu-L[c] <==  | Transport, Mitochondrial      |                                            |
| MALTe              | 1          | WT Unique | alpha-glucosidase, extrac            | [e] : h2o + r | Starch and Sucrose Metabolism |                                            |
| NACHEX27ly         | 25.72082   | WT Unique | beta-N-acetylhexosamini              | [I] : h2o + h | Hyaluronan Metabolism         |                                            |
| NRPPHRt4(2)r       | 500000     | WT Unique | Norepinephrine reversibl             | (2) na1[e] +  | Transport, Extracellular      |                                            |
| PYDXDH             | 1          | WT Unique | pyridoxal dehydrogenase              | [c] : h2o + o | Vitamin B6 Metabolism         |                                            |

|              |            |           |                                                   |                                            |
|--------------|------------|-----------|---------------------------------------------------|--------------------------------------------|
| TCHOLAt      | 258.922917 | WT Unique | taurocholate transport via hco3[c] + tc           | Transport, Extracellular                   |
| TCHOLAt3     | 258.922917 | WT Unique | ABC bile acid transporter atp[c] + h2c            | Transport, Extracellular                   |
| TRPt         | 1          | WT Unique | L-tryptophan transport trp-L[e] <==               | Transport, Extracellular                   |
| VALTA        | 500000     | WT Unique | valine transaminase [c] : ak + v                  | Valine, Leucine, and Isoleucine Metabolism |
| VALTAm       | 500000     | WT Unique | valine transaminase, mitochondrial [m] : ak + v   | Valine, Leucine, and Isoleucine Metabolism |
| VALt5m       | 500000     | WT Unique | Valine reversible mitochondrial val-L[c] <==      | Transport, Mitochondrial                   |
| sink_3mob(c) | 1          | WT Unique | 3-Methyl-2-oxobutanoate Demand                    | Transport                                  |
| sink_3mop    | 1          | WT Unique | (S)-3-Methyl-2-oxopentanoate Demand               | Transport                                  |
| sink_4mop    | 1          | WT Unique | 4-Methyl-2-oxopentanoate Demand                   | Transport                                  |
| AHCYStr      | 3          | KO Unique | S-Adenosyl-L-homocysteine ahcys[c] <==            | Transport, Endoplasmic Reticular           |
| AMETr        | 3          | KO Unique | S-Adenosyl-L-methionine amet[c] <==               | Transport, Endoplasmic Reticular           |
| AMETt2m      | 3          | KO Unique | S-Adenosyl-L-methionine ahcys[m] +                | Transport, Mitochondrial                   |
| ARGt4        | 1          | KO Unique | L-arginine transport in via arg-L[e] + n          | Transport, Extracellular                   |
| ASPCTr       | 49.980399  | KO Unique | aspartate carbamoyltransferase [c] : asp-L +      | Pyrimidine Biosynthesis                    |
| BTNt3i       | 259.722917 | KO Unique | Biotin transport via sodium atp[c] + btn          | Transport, Extracellular                   |
| CBPS         | 49.980399  | KO Unique | carbamoyl-phosphate synthase [c] : (2) atp        | Pyrimidine Biosynthesis                    |
| CYSt4        | 500000     | KO Unique | L-cysteine reversible transmembrane cys-L[e] + n  | Transport, Extracellular                   |
| CYTDn        | 65.005729  | KO Unique | cytidine deaminase, nuclear [n] : cytd +          | Nucleotides                                |
| CYTDtn       | 65.005729  | KO Unique | cytidine transport in nuclear cytd[c] <==>        | Transport, Nuclear                         |
| DHORD9       | 49.980399  | KO Unique | dihydroorotic acid dehydratase dhor-S[c] +        | Pyrimidine Biosynthesis                    |
| DHORTS       | 49.980399  | KO Unique | dihydroorotase [c] : dhor-S                       | Pyrimidine Biosynthesis                    |
| EX_tyr-L(e)  | 1          | KO Unique | L-tyrosine transport in via sodium syr            | L-tyrosine transport in via sodium symport |
| GHMT2r       | 29.264607  | KO Unique | glycine hydroxymethyltransferase [c] : ser-L +    | Glycine, Serine, and Threonine Metabolism  |
| GLCtly       | 2          | KO Unique | glucose efflux from lysosomes glc-D[l] -->        | Transport, Lysosomal                       |
| GMPS2        | 86.907639  | KO Unique | GMP synthase [c] : atp + g                        | Nucleotides                                |
| ILEt4        | 500000     | KO Unique | L-isoleucine transport in via ile-L[e] + n        | Transport, Extracellular                   |
| IMPD         | 86.907639  | KO Unique | IMP dehydrogenase [c] : h2o + i                   | Nucleotides                                |
| MALTly       | 1          | KO Unique | alpha-glucosidase, lysosomal [l] : h2o + n        | Starch and Sucrose Metabolism              |
| MALTt1r      | 1          | KO Unique | maltose transport (unipolar) malt[e] <==          | Transport, Extracellular                   |
| NH4tn        | 65.005729  | KO Unique | ammonia nuclear transport nh4[c] <==>             | Transport, Nuclear                         |
| OMPDC        | 45.991031  | KO Unique | orotidine-5'-phosphate decarboxylase [c] : h + o  | Pyrimidine Biosynthesis                    |
| ORPT         | 45.991031  | KO Unique | orotate phosphoribosyltransferase [c] : orot5p    | Pyrimidine Biosynthesis                    |
| PCFLOPm      | 1          | KO Unique | phosphatidylcholine flippase atp[c] + h2c         | Transport, Mitochondrial                   |
| PETOHMm_hs   | 1          | KO Unique | phosphatidylethanolamine phosphatase [m] : (3) am | Glycerophospholipid Metabolism             |

|              |                     |                                          |                                           |
|--------------|---------------------|------------------------------------------|-------------------------------------------|
| PETOHMr_hs   | 1 KO Unique         | phosphatidylethanolamir [r] : (3) ame    | Glycerophospholipid Metabolism            |
| PE_HSter     | 1 KO Unique         | phosphatidylethanolamir pe_hs[c] <=      | Transport, Endoplasmic Reticular          |
| PGCD         | 40.05 KO Unique     | phosphoglycerate dehyd [c] : 3pg + n     | Glycine, Serine, and Threonine Metabolism |
| PSERT        | 40.05 KO Unique     | phosphoserine transamir [c] : 3php +     | Glycine, Serine, and Threonine Metabolism |
| PSP_L        | 40.05 KO Unique     | phosphoserine phosphat [c] : h2o + p     | Glycine, Serine, and Threonine Metabolism |
| TRPt4        | 1 KO Unique         | L-tryptophan transport ir na1[e] + trp   | Transport, Extracellular                  |
| TYRt4        | 1 KO Unique         | L-tyrosine transport in vi: na1[e] + tyr | Transport, Extracellular                  |
| Uritn        | 65.005729 KO Unique | uridine transport in nucl: uri[c] <==>   | Transport, Nuclear                        |
| VALt4        | 500000 KO Unique    | L-valine transport in via s na1[e] + val | Transport, Extracellular                  |
| sink_orot(c) | 20.025 KO Unique    | Orotate demand                           | Transport                                 |

MULTISPECIFIC DRUG TRANSPORTER Slc22a8 (Oat3) REGULATES MULTIPLE METABOLIC PATHWAYS. Wei Wu, Neema Jamshidi, Satish A. Eraly, Henry C. Liu, Kevin T. Bush, Bernhard O. Palsson and Sanjay K. Nigam. DRUG METABOLISM AND DISPOSITION.
