# Supplementary material
Source: PubMed Central journal article supplement (PMC3781372)
Supplement: supp_113.052647_Supplementary_tables_2_52647.pdf [file supp_113.052647_Supplementary_tables_2_52647.pdf]

Supplemental Table 2. Min\_max\_span\_tx

| Reactions       | minWT | maxWT | spanW | minKO | maxKO | spanKO | spanKO/spanW | Name             | Equation         | Subsystem        |
|-----------------|-------|-------|-------|-------|-------|--------|--------------|------------------|------------------|------------------|
| DM_datp(m)      | 0     | 3.3   | 3.3   | 0     | 9.45  | 9.45   | 2.863636364  | Transport/Demand | Transport/Demand | Transport/Demand |
| DM_datp(n)      | 0     | 3.3   | 3.3   | 0     | 9.45  | 9.45   | 2.863636364  | Transport/Demand | Transport/Demand | Transport/Demand |
| DM_dctp(m)      | 0     | 1.3   | 1.3   | 0     | 13.35 | 13.35  | 10.26923077  | Transport/Demand | Transport/Demand | Transport/Demand |
| DM_dctp(n)      | 0     | 1.3   | 1.3   | 0     | 13.35 | 13.35  | 10.26923077  | Transport/Demand | Transport/Demand | Transport/Demand |
| DM_dgtp(m)      | 0     | 0.15  | 0.15  | 0     | 9.45  | 9.45   | 63           | Transport/Demand | Transport/Demand | Transport/Demand |
| DM_dgtp(n)      | 0     | 0.15  | 0.15  | 0     | 9.45  | 9.45   | 63           | Transport/Demand | Transport/Demand | Transport/Demand |
| DM_dttp(m)      | 0     | 1.3   | 1.3   | 0     | 14.91 | 14.913 | 11.47183154  | Transport/Demand | Transport/Demand | Transport/Demand |
| DM_dttp(n)      | 0     | 1.3   | 1.3   | 0     | 15.67 | 15.666 | 12.05089846  | Transport/Demand | Transport/Demand | Transport/Demand |
| DM_ethamp(r)    | 0     | 1     | 1     | 0     | 37.31 | 37.309 | 37.308694    | Transport/Demand | Transport/Demand | Transport/Demand |
| EX_2hb(e)       | 0     | 2     | 2     | 0     | 3     | 3      | 1.5          | Transport/Demand | Transport/Demand | Transport/Demand |
| EX_2mcit(e)     | 0     | 2     | 2     | 0     | 3     | 3      | 1.5          | Transport/Demand | Transport/Demand | Transport/Demand |
| EX_35cgmp(e)    | 0     | 0.15  | 0.15  | 0     | 9.45  | 9.45   | 63           | Transport/Demand | Transport/Demand | Transport/Demand |
| EX_3aib-D(e)    | 0     | 1.3   | 1.3   | 0     | 27.65 | 27.649 | 21.26809769  | Transport/Demand | Transport/Demand | Transport/Demand |
| EX_4hphac(e)    | 0     | 1     | 1     | 0     | 2     | 2      | 2            | Transport/Demand | Transport/Demand | Transport/Demand |
| EX_adn(e)       | 0     | 3.3   | 3.3   | 0     | 9.45  | 9.45   | 2.863636364  | Transport/Demand | Transport/Demand | Transport/Demand |
| EX_camp(e)      | 0     | 3.3   | 3.3   | 0     | 9.45  | 9.45   | 2.863636364  | Transport/Demand | Transport/Demand | Transport/Demand |
| EX_chol(e)      | -1    | 0     | 1     | -1    | 0.333 | 1.3333 | 1.333333     | Transport/Demand | Transport/Demand | Transport/Demand |
| EX_cytd(e)      | 0     | 1.3   | 1.3   | 0     | 13.35 | 13.35  | 10.26923077  | Transport/Demand | Transport/Demand | Transport/Demand |
| EX_dad-2(e)     | 0     | 3.3   | 3.3   | 0     | 9.45  | 9.45   | 2.863636364  | Transport/Demand | Transport/Demand | Transport/Demand |
| EX_dcyt(e)      | 0     | 1.3   | 1.3   | 0     | 13.35 | 13.35  | 10.26923077  | Transport/Demand | Transport/Demand | Transport/Demand |
| EX_dgsn(e)      | 0     | 0.15  | 0.15  | 0     | 9.45  | 9.45   | 63           | Transport/Demand | Transport/Demand | Transport/Demand |
| EX_din(e)       | 0     | 3.3   | 3.3   | 0     | 11.81 | 11.813 | 3.579545455  | Transport/Demand | Transport/Demand | Transport/Demand |
| EX_duri(e)      | 0     | 1.3   | 1.3   | 0     | 19.74 | 19.744 | 15.18796385  | Transport/Demand | Transport/Demand | Transport/Demand |
| EX_for(e)       | 0     | 2     | 2     | 0     | 3     | 3      | 1.5          | Transport/Demand | Transport/Demand | Transport/Demand |
| EX_gly(e)       | -1    | 1     | 2     | -1    | 19.53 | 20.525 | 10.2625      | Transport/Demand | Transport/Demand | Transport/Demand |
| EX_gsn(e)       | 0     | 0.15  | 0.15  | 0     | 9.45  | 9.45   | 63           | Transport/Demand | Transport/Demand | Transport/Demand |
| EX_ile-L(e)     | -1    | 0     | 1     | -0.57 | 0     | 0.5684 | 0.568421     | Transport/Demand | Transport/Demand | Transport/Demand |
| EX_ins(e)       | 0     | 3.3   | 3.3   | 0     | 11.81 | 11.813 | 3.579545455  | Transport/Demand | Transport/Demand | Transport/Demand |
| EX_lpchol_hs(e) | 0     | 1     | 1     | 0     | 1.333 | 1.3333 | 1.333333     | Transport/Demand | Transport/Demand | Transport/Demand |
| EX_meoh(e)      | 0     | 2     | 2     | 0     | 3     | 3      | 1.5          | Transport/Demand | Transport/Demand | Transport/Demand |
| EX_pchol_hs(e)  | 0     | 1     | 1     | 0     | 1.333 | 1.3333 | 1.333333     | Transport/Demand | Transport/Demand | Transport/Demand |
| EX_pe_hs(e)     | 0     | 1     | 1     | 0     | 4.5   | 4.5    | 4.5          | Transport/Demand | Transport/Demand | Transport/Demand |
| EX_pi(e)        | -21.3 | 6.6   | 27.92 | -51.8 | 6.6   | 58.364 | 2.090738431  | Transport/Demand | Transport/Demand | Transport/Demand |
| EX_ps_hs(e)     | 0     | 1     | 1     | 0     | 4.5   | 4.5    | 4.5          | Transport/Demand | Transport/Demand | Transport/Demand |
| EX_ser-L(e)     | -1    | 0     | 1     | -1    | 40.05 | 41.05  | 41.05        | Transport/Demand | Transport/Demand | Transport/Demand |
| EX_spc_hs(e)    | 0     | 1     | 1     | 0     | 1.333 | 1.3333 | 1.333333     | Transport/Demand | Transport/Demand | Transport/Demand |
| EX_sph1p(e)     | 0     | 1     | 1     | 0     | 9.255 | 9.2546 | 9.254618     | Transport/Demand | Transport/Demand | Transport/Demand |
| EX_sphs1p(e)    | 0     | 1     | 1     | 0     | 9.09  | 9.0903 | 9.090335     | Transport/Demand | Transport/Demand | Transport/Demand |
| EX_tymsf(e)     | 0     | 1     | 1     | 0     | 2     | 2      | 2            | Transport/Demand | Transport/Demand | Transport/Demand |
| EX_urate(e)     | 0     | 3.3   | 3.3   | 0     | 11.81 | 11.813 | 3.579545455  | Transport/Demand | Transport/Demand | Transport/Demand |
| EX_uri(e)       | 0     | 1.3   | 1.3   | 0     | 20.03 | 20.025 | 15.40384615  | Transport/Demand | Transport/Demand | Transport/Demand |
| EX_val-L(e)     | -1    | 0     | 1     | -0.73 | 0     | 0.7298 | 0.729825     | Transport/Demand | Transport/Demand | Transport/Demand |
| sink_34hpl(m)   | 0     | 1     | 1     | 0     | 2     | 2      | 2            | Transport/Demand | Transport/Demand | Transport/Demand |
| sink_34hpp      | 0     | 1     | 1     | 0     | 2     | 2      | 2            | Transport/Demand | Transport/Demand | Transport/Demand |
| sink_4hphac(c)  | 0     | 1     | 1     | 0     | 2     | 2      | 2            | Transport/Demand | Transport/Demand | Transport/Demand |
| sink_nadp(c)    | 0     | 0     | 0     | 0     | 0     | 0      | #DIV/0!      | Transport/Demand | Transport/Demand | Transport/Demand |

MULTISPECIFIC DRUG TRANSPORTER Slc22a8 (Oat3) REGULATES MULTIPLE METABOLIC PATHWAYS.

Wei Wu, Neema Jamshidi, Satish A. Eraly, Henry C. Liu, Kevin T. Bush, Bernhard O. Palsson and Sanjay K. Nigam.  
DRUG METABOLISM AND DISPOSITION.
