# Supplementary material
Source: PubMed Central journal article supplement (PMC3781372)
Supplement: supp_113.052647_Supplementary_tables_3_52647.pdf [file supp_113.052647_Supplementary_tables_3_52647.pdf]

Supplemental Table 3. Min\_max\_span\_internal

| Reactions     | minWT | maxWT | spanW | minKO | maxKO | spanKC | spanKO | Name                                   | Equation | Subsystem                |
|---------------|-------|-------|-------|-------|-------|--------|--------|----------------------------------------|----------|--------------------------|
| 2HBO          | -2    | 0     | 2     | -3    | 0     | 3      | 1.5    | 2-Hydroxybut [c] : 2hb + na            |          | Propanoate Metabolism    |
| 2HBt2         | -2    | 0     | 2     | -3    | 0     | 3      | 1.5    | 2-hydroxybut 2hb[e] + h[e]             |          | Transport, Extracellular |
| 2MCITt        | 0     | 2     | 2     | 0     | 3     | 3      | 1.5    | 2-methylcitra 2mcit[c] <==>            |          | Transport, Extracellular |
| 34HPLFM       | 0     | 1     | 1     | 0     | 2     | 2      | 2      | 3-(4-hydroxy) [m] : 34hpp + Ubiquinone |          | Biosynthesis             |
| 3DSPHR        | 0     | 1     | 1     | 0     | 37.54 | 37.54  | 37.536 | 3-Dehydrospl [c] : 3dsphgn             |          | Sphingolipid Metabolism  |
| 4HOXPACDOX(N/ | 0     | 1     | 1     | 0     | 2     | 2      | 2      | 4-Hydroxyph [c] : 4hoxpac              |          | Tyrosine metabolism      |
| AACTOOR       | 0     | 2     | 2     | 0     | 24.58 | 24.58  | 12.291 | Aminoaceton [c] : aact + h2            |          | Gly, Ser, Thr Metabolism |
| AACTtm        | 0     | 2     | 2     | 0     | 24.58 | 24.58  | 12.291 | Aminoaceton aact[m] --> a              |          | Transport, Mitochondrial |
| ACAct2m       | -217  | 260.7 | 478.1 | -219  | 149.7 | 368.6  | 0.771  | Acetoacetate acac[c] + h[c]            |          | Transport, Mitochondrial |
| ACActx        | -254  | 0     | 254.4 | -130  | 0     | 129.9  | 0.5105 | acetoacetate acac[c] <==>              |          | Transport, Peroxisomal   |
| ACGAMtly      | 0     | 56.44 | 56.44 | 0     | 5     | 5      | 0.0886 | N-acetyl-gluc acgam[l] --> e           |          | Transport, Lysosomal     |
| ADK3m         | 0     | 4.6   | 4.6   | 0     | 16.41 | 16.41  | 3.5666 | adentylate ki [m] : amp + g            |          | Nucleotides              |
| ADNK1m        | 0     | 4.6   | 4.6   | 0     | 16.41 | 16.41  | 3.5666 | adenosine kir [m] : adn + at           |          | Nucleotides              |
| ADNtm         | 0     | 4.6   | 4.6   | 0     | 16.41 | 16.41  | 3.5666 | adenosine far adn[c] <==> a            |          | Transport, Mitochondrial |
| ADSL2         | 0     | 2     | 2     | 0     | 10.51 | 10.51  | 5.2563 | adenylosuccii [c] : 25aics -->         |          | IMP Biosynthesis         |
| AHC           | 0     | 2     | 2     | 0     | 3     | 3      | 1.5    | adenosylhom [c] : ahcys + h            |          | Methionine Metabolism    |
| AICART        | 0     | 2     | 2     | 0     | 10.51 | 10.51  | 5.2563 | phosphoribo [c] : 10fthf + i           |          | IMP Biosynthesis         |
| AIRCr         | 0     | 2     | 2     | 0     | 10.51 | 10.51  | 5.2563 | phosphoribo [c] : air + co2            |          | IMP Biosynthesis         |
| AKGMALtm      | -708  | 5E+05 | 5E+05 | -710  | 170   | 879.9  | 0.0018 | alpha-ketogl akg[m] + mal              |          | Transport, Mitochondrial |
| ALCD1         | -2    | 0     | 2     | -3    | 0     | 3      | 1.5    | alcohol dehy [c] : meoh + r            |          | Miscellaneous            |
| AOBUTDsm      | 0     | 2     | 2     | 0     | 24.58 | 24.58  | 12.291 | L-2-amino-3-[m] : 2aobut               |          | Gly, Ser, Thr Metabolism |
| BETALDHxm     | 0     | 1     | 1     | 0     | 2     | 2      | 2      | betaine-alde [m] : betald +            |          | Gly, Ser, Thr Metabolism |
| BHMT          | 0     | 1     | 1     | 0     | 2     | 2      | 2      | betaine-hom [c] : glyb + hc            |          | Gly, Ser, Thr Metabolism |
| BPNT          | 0     | 1     | 1     | 0     | 2     | 2      | 2      | 3',5'-bisphos [c] : h2o + pa           |          | Nucleotides              |
| BUP2          | 0     | 1.3   | 1.3   | 0     | 27.65 | 27.65  | 21.268 | beta-ureidop [c] : 3uib + (2           |          | Pyrimidine Catabolism    |
| CAMPt         | 0     | 3.3   | 3.3   | 0     | 9.45  | 9.45   | 2.8636 | cAMP transp atp[c] + cam               |          | Transport, Extracellular |
| CGMPt         | 0     | 0.15  | 0.15  | 0     | 9.45  | 9.45   | 63     | cGMP transp 35cgmp[c] + :              |          | Transport, Extracellular |
| CHLtm         | 0     | 1     | 1     | 0     | 2     | 2      | 2      | choline trans chol[c] <==>             |          | Transport, Mitochondrial |
| CHOLD2m       | 0     | 1     | 1     | 0     | 2     | 2      | 2      | choline dehy [m] : chol + f            |          | Gly, Ser, Thr Metabolism |
| CHOLtu        | 0     | 1     | 1     | -0.33 | 1     | 1.333  | 1.3333 | Choline unipc chol[e] <==>             |          | Transport, Extracellular |
| CLFORtex      | 0     | 1     | 1     | 0     | 1.5   | 1.5    | 1.5    | chloride tran: cl[e] + (2) fo          |          | Transport, Extracellular |
| COAAtm        | -108  | 234.8 | 342.7 | -108  | 0     | 108.2  | 0.3158 | CoA transpor coa[c] <==>               |          | Transport, Mitochondrial |
| COAtp         | -254  | 0     | 254.4 | -130  | 0     | 129.9  | 0.5105 | coenzyme A t coa[c] <==>               |          | Transport, Peroxisomal   |
| CRNCARtp      | 0     | 254.4 | 254.4 | 0     | 129.9 | 129.9  | 0.5105 | carnitine-ace acrn[x] + crn            |          | Transport, Peroxisomal   |
| CSNATp        | 0     | 254.4 | 254.4 | 0     | 129.9 | 129.9  | 0.5105 | carnitine O-a [x] : accoa + c          |          | Fatty Acid Metabolism    |
| CYTDt         | -1.15 | 0.15  | 1.3   | -13.2 | 0.15  | 13.35  | 10.269 | cytidine facil cytd[e] <==>            |          | Transport, Extracellular |
| D-3AIBt       | 0     | 1.3   | 1.3   | 0     | 27.65 | 27.65  | 21.268 | D-3-amino-isi 3aib-D[c] -->            |          | Transport, Extracellular |
| DATPtn        | 0     | 3.3   | 3.3   | 0     | 9.45  | 9.45   | 2.8636 | dATP diffusio datp[c] <==>             |          | Transport, Nuclear       |
| DCTPtn        | 0     | 1.3   | 1.3   | 0     | 13.35 | 13.35  | 10.269 | dCTP diffusio dctp[c] <==>             |          | Transport, Nuclear       |
| DCYTt         | -1.3  | 0     | 1.3   | -13.4 | 0     | 13.35  | 10.269 | deoxycytidin dcyt[e] <==>              |          | Transport, Extracellular |
| DGK1          | -4.6  | 0     | 4.6   | -16.5 | 0     | 16.46  | 3.5779 | deoxyguanyl [c] : atp + dgr            |          | Nucleotides              |
| DGK2m         | 0     | 4.6   | 4.6   | 0     | 16.33 | 16.33  | 3.5507 | deoxyguanyl [m] : datp + d             |          | Nucleotides              |
| DGNSKm        | 0     | 4.6   | 4.6   | 0     | 16.33 | 16.33  | 3.5507 | deoxyguanos [m] : atp + dg             |          | Nucleotides              |
| DGSNt         | -0.15 | 0     | 0.15  | -9.45 | 0     | 9.45   | 63     | deoyguanosir dgsn[e] <==>              |          | Transport, Extracellular |
| DGSNtm        | 0     | 4.6   | 4.6   | 0     | 16.33 | 16.33  | 3.5507 | deoyguanosir dgsn[c] <==>              |          | Transport, Mitochondrial |
| DGTPtn        | 0     | 0.15  | 0.15  | 0     | 9.45  | 9.45   | 63     | dGTP diffusio dgtp[c] <==>             |          | Transport, Nuclear       |
| DHCRD1        | 0     | 1     | 1     | 0     | 37.31 | 37.31  | 37.309 | dihydroceran [c] : dhcrm_h             |          | Sphingolipid Metabolism  |
| DHFR          | 0     | 1.3   | 1.3   | 0     | 27.65 | 27.65  | 21.268 | dihydrofolate [c] : dhf + h +          |          | Folate Metabolism        |
| DHPM1         | 0     | 1.3   | 1.3   | 0     | 47.17 | 47.17  | 36.287 | dihydropyrim [c] : 56dura +            |          | Pyrimidine Catabolism    |
| DHPM2         | 0     | 1.3   | 1.3   | 0     | 27.65 | 27.65  | 21.268 | dihydropyrim [c] : 56dthm              |          | Pyrimidine Catabolism    |
| DMGDHm        | 0     | 1     | 1     | 0     | 2     | 2      | 2      | dimethylglyci [m] : dmgly +            |          | Gly, Ser, Thr Metabolism |
| DMGtm         | 0     | 1     | 1     | 0     | 2     | 2      | 2      | dimethylglyci dmgly[c] <==             |          | Transport, Mitochondrial |
| DNDPt12m      | 0     | 4.6   | 4.6   | 0     | 16.41 | 16.41  | 3.5666 | dADP transpc adp[m] + dad              |          | Transport, Mitochondrial |
| DNDPt13m      | 0     | 4.6   | 4.6   | 0     | 16.41 | 16.41  | 3.5666 | dADP transpc atp[m] + dad              |          | Transport, Mitochondrial |

|            |       |       |       |       |       |       |        |                                           |                             |
|------------|-------|-------|-------|-------|-------|-------|--------|-------------------------------------------|-----------------------------|
| DNDPt18m   | 0     | 4.6   | 4.6   | 0     | 16.41 | 16.41 | 3.5666 | dUDP transpc adp[m] + dud                 | Transport, Mitochondrial    |
| DNDPt19m   | 0     | 4.6   | 4.6   | 0     | 16.41 | 16.41 | 3.5666 | dUDP transpc atp[m] + dud                 | Transport, Mitochondrial    |
| DNDPt1m    | 0     | 3.95  | 3.95  | 0     | 10.27 | 10.27 | 2.5995 | dATP transpo adp[m] + dat                 | Transport, Mitochondrial    |
| DNDPt20m   | 0     | 4.6   | 4.6   | 0     | 16.41 | 16.41 | 3.5666 | dTDP transpc atp[m] + dtd                 | Transport, Mitochondrial    |
| DNDPt21m   | 0     | 4.6   | 4.6   | 0     | 16.41 | 16.41 | 3.5666 | dTDP transpc adp[m] + dtd                 | Transport, Mitochondrial    |
| DNDPt2m    | 0     | 3.95  | 3.95  | 0     | 10.27 | 10.27 | 2.5995 | dATP transpo atp[m] + dat                 | Transport, Mitochondrial    |
| DNDPt30m   | 0     | 4.6   | 4.6   | 0     | 16.41 | 16.41 | 3.5666 | dCDP transpc adp[m] + dcd                 | Transport, Mitochondrial    |
| DNDPt31m   | 0     | 4.6   | 4.6   | 0     | 16.41 | 16.41 | 3.5666 | dCDP transpc atp[m] + dcd                 | Transport, Mitochondrial    |
| DNDPt32m   | 0     | 4.6   | 4.6   | 0     | 16.41 | 16.41 | 3.5666 | dGDP transpc atp[m] + dgd                 | Transport, Mitochondrial    |
| DNDPt3m    | 0     | 7.9   | 7.9   | 0     | 20.48 | 20.48 | 2.5925 | dATP transpo datp[c] + dcd                | Transport, Mitochondrial    |
| DNDPt44m   | 0     | 1.3   | 1.3   | 0     | 14.91 | 14.91 | 11.472 | dTTP transpo atp[m] + dttp                | Transport, Mitochondrial    |
| DNDPt45m   | 0     | 1.3   | 1.3   | 0     | 14.91 | 14.91 | 11.472 | dTTP transpo adp[m] + dttp                | Transport, Mitochondrial    |
| DNDPt46m   | 0     | 1.3   | 1.3   | 0     | 14.91 | 14.91 | 11.472 | dTTP transpo dttp[c] + dud                | Transport, Mitochondrial    |
| DNDPt47m   | 0     | 1.3   | 1.3   | 0     | 14.91 | 14.91 | 11.472 | dTTP transpo dtdp[m] + dti                | Transport, Mitochondrial    |
| DNDPt48m   | 0     | 1.3   | 1.3   | 0     | 14.91 | 14.91 | 11.472 | dTTP transpo dgdp[m] + dti                | Transport, Mitochondrial    |
| DNDPt49m   | 0     | 1.3   | 1.3   | 0     | 14.91 | 14.91 | 11.472 | dTTP transpo dadp[m] + dti                | Transport, Mitochondrial    |
| DNDPt4m    | 0     | 7.9   | 7.9   | 0     | 20.48 | 20.48 | 2.5925 | dATP transpo datp[c] + dud                | Transport, Mitochondrial    |
| DNDPt50m   | 0     | 1.3   | 1.3   | 0     | 14.91 | 14.91 | 11.472 | dTTP transpo dcdp[m] + dti                | Transport, Mitochondrial    |
| DNDPt51m   | 0     | 1.3   | 1.3   | 0     | 13.35 | 13.35 | 10.269 | dCTP transpo dcdp[m] + dc                 | Transport, Mitochondrial    |
| DNDPt52m   | 0     | 1.3   | 1.3   | 0     | 13.35 | 13.35 | 10.269 | dCTP transpo dctp[c] + dud                | Transport, Mitochondrial    |
| DNDPt53m   | 0     | 1.3   | 1.3   | 0     | 13.35 | 13.35 | 10.269 | dCTP transpo dctp[c] + dgd                | Transport, Mitochondrial    |
| DNDPt54m   | 0     | 1.3   | 1.3   | 0     | 13.35 | 13.35 | 10.269 | dCTP transpo dadp[m] + dc                 | Transport, Mitochondrial    |
| DNDPt55m   | 0     | 1.3   | 1.3   | 0     | 13.35 | 13.35 | 10.269 | dCTP transpo adp[m] + dct                 | Transport, Mitochondrial    |
| DNDPt56m   | 0     | 1.3   | 1.3   | 0     | 13.35 | 13.35 | 10.269 | dCTP transpo atp[m] + dct                 | Transport, Mitochondrial    |
| DNDPt57m   | 0     | 0.15  | 0.15  | 0     | 9.45  | 9.45  | 63     | dGTP transpc atp[m] + dgt                 | Transport, Mitochondrial    |
| DNDPt58m   | 0     | 0.15  | 0.15  | 0     | 9.45  | 9.45  | 63     | dGTP transpc adp[m] + dgt                 | Transport, Mitochondrial    |
| DNDPt59m   | 0     | 0.15  | 0.15  | 0     | 9.45  | 9.45  | 63     | dGTP transpc dadp[m] + dg                 | Transport, Mitochondrial    |
| DNDPt5m    | 0     | 7.9   | 7.9   | 0     | 20.48 | 20.48 | 2.5925 | dATP transpo datp[c] + dtd                | Transport, Mitochondrial    |
| DNDPt60m   | 0     | 0.15  | 0.15  | 0     | 9.45  | 9.45  | 63     | dGTP transpc dgtp[c] + dud                | Transport, Mitochondrial    |
| DNDPt61m   | 0     | 0.15  | 0.15  | 0     | 9.45  | 9.45  | 63     | dGTP transpc dgtp[c] + dtd                | Transport, Mitochondrial    |
| DNDPt62m   | 0     | 0.15  | 0.15  | 0     | 9.45  | 9.45  | 63     | dGTP transpc dgdp[m] + dg                 | Transport, Mitochondrial    |
| DNDPt63m   | 0     | 0.15  | 0.15  | 0     | 9.45  | 9.45  | 63     | dGTP transpc dcdp[m] + dg                 | Transport, Mitochondrial    |
| DNDPt6m    | 0     | 7.9   | 7.9   | 0     | 20.48 | 20.48 | 2.5925 | dATP transpo datp[c] + dgd                | Transport, Mitochondrial    |
| DNDPt7m    | 0     | 7.9   | 7.9   | 0     | 20.48 | 20.48 | 2.5925 | dATP transpo dadp[m] + da                 | Transport, Mitochondrial    |
| DOPAtu     | ##### | 388.4 | 5E+05 | 0     | 389.6 | 389.6 | 0.0008 | Dopamine un dopa[e] <==>                  | Transport, Extracellular    |
| DSAT       | 0     | 1     | 1     | 0     | 37.31 | 37.31 | 37.309 | dihydrosphin[c] : Rtotalco                | Sphingolipid Metabolism     |
| DTMPK      | 0     | 1.3   | 1.3   | 0     | 15.67 | 15.67 | 12.051 | dTMP kinase [c] : atp + dtn               | Nucleotides                 |
| DTTPtn     | 0     | 1.3   | 1.3   | 0     | 15.67 | 15.67 | 12.051 | dTTP diffusio dttp[c] <==>                | Transport, Nuclear          |
| DURAD      | -1.3  | 0     | 1.3   | -47.2 | 0     | 47.17 | 36.287 | dihydrouacil [c] : 56dura                 | + Pyrimidine Catabolism     |
| DURAD2     | -1.3  | 0     | 1.3   | -27.6 | 0     | 27.65 | 21.268 | dihydrothymi [c] : 56dthm                 | - Pyrimidine Catabolism     |
| DURIPP     | -1.3  | 0     | 1.3   | -27.8 | 0     | 27.78 | 21.371 | deoxyuridine [c] : duri + pi              | - Nucleotides               |
| DURit      | -1.3  | 0     | 1.3   | -19.7 | 0     | 19.74 | 15.188 | deoxyuridine duri[e] <==>                 | Transport, Extracellular    |
| FACOAL160i | 0     | 22.48 | 22.48 | 0     | 38.31 | 38.31 | 1.7043 | C160 fatty ac [c] : atp + coa             | Fatty acid activation       |
| FALDH      | -1    | 1     | 2     | -1    | 2     | 3     | 1.5    | formaldehyd[c] : fald + gtf               | Tyrosine metabolism         |
| FALDtm     | 0     | 1     | 1     | 0     | 2     | 2     | 2      | formaldehyd[c] : fald[m] <==>             | Transport, Mitochondrial    |
| FORT2m     | -2    | 0     | 2     | -3    | 0     | 3     | 1.5    | formate mito for[m] <==>                  | f Transport, Mitochondrial  |
| FTHFL      | 0     | 2     | 2     | 0     | 3     | 3     | 1.5    | formate-tetr[c] : atp + for               | Folate Metabolism           |
| FTHFLm     | 0     | 2     | 2     | 0     | 3     | 3     | 1.5    | formate-tetr[m] : atp + fo                | Folate Metabolism           |
| GARFT      | 0     | 2     | 2     | 0     | 10.51 | 10.51 | 5.2563 | phosphoribo[c] : 10fthf + i               | IMP Biosynthesis            |
| GLUPRT     | 0     | 2     | 2     | 0     | 10.51 | 10.51 | 5.2563 | glutamine ph [c] : gln-L + h              | IMP Biosynthesis            |
| GLUt2m     | -562  | 5E+05 | 5E+05 | -565  | 160.6 | 725.3 | 0.0014 | L-glutamate r glu-L[c] + h[c]             | Transport, Mitochondrial    |
| GLYATm     | 0     | 2     | 2     | 0     | 24.58 | 24.58 | 12.291 | glycine C-ace [m] : accoa + Gly, Ser, Thr | Metabolism                  |
| GLYBtm     | 0     | 1     | 1     | 0     | 2     | 2     | 2      | Glycine betai glyb[m] <==>                | Transport, Mitochondrial    |
| GLYOp      | 0     | 2     | 2     | 0     | 26.22 | 26.22 | 13.112 | glycine oxida: [x] : gly + h2o            | Gly, Ser, Thr Metabolism    |
| GLYtm      | -3    | 1     | 4     | -3    | 24.58 | 27.58 | 6.8953 | glycine passiv gly[c] <==>                | gl Transport, Mitochondrial |
| GLYtp      | 0     | 2     | 2     | 0     | 26.22 | 26.22 | 13.112 | glycine passiv gly[c] <==>                | gl Transport, Peroxisomal   |

|          |       |       |       |       |       |       |        |                                                                 |
|----------|-------|-------|-------|-------|-------|-------|--------|-----------------------------------------------------------------|
| GMPR     | 0     | 0.15  | 0.15  | 0     | 86.92 | 86.92 | 579.45 | GMP reducta [c] : gmp + (2 Nucleotides                          |
| GSNt     | 0     | 0.15  | 0.15  | -9.3  | 0.15  | 9.45  | 63     | guanosine fa gsn[e] <==> g Transport, Extracellular             |
| GUAD     | 0     | 0.15  | 0.15  | 0     | 11.81 | 11.81 | 78.75  | guanine dean [c] : gua + h + Purine Catabolism                  |
| H2Otlly  | 0     | 110.9 | 110.9 | 0     | 9     | 9     | 0.0812 | H2O transpor h2o[c] <==> f Transport, Lysosomal                 |
| HDCATER  | 0     | 1     | 1     | 0     | 37.31 | 37.31 | 37.309 | palmitate ER hdca[r] --> hc Transport, ER                       |
| HMGCOAtm | -235  | 107.9 | 342.7 | 0     | 108.2 | 108.2 | 0.3158 | Hydroxymeth hmgcoa[c] <= Transport, Mitochondrial               |
| HMGCOAtx | 0     | 254.4 | 254.4 | 0     | 129.9 | 129.9 | 0.5105 | Hydroxymeth hmgcoa[c] <= Transport, Peroxisomal                 |
| HMGLm    | 0     | 296.8 | 296.8 | 0     | 108.2 | 108.2 | 0.3646 | hydroxymeth [m] : hmgcoa Cholesterol Metabolism                 |
| HMGLx    | 0     | 254.4 | 254.4 | 0     | 129.9 | 129.9 | 0.5105 | hydroxymeth [x] : hmgcoa · Cholesterol Metabolism               |
| HPACTr   | 0     | 1     | 1     | 0     | 2     | 2     | 2      | hydroxyphen 4hphac[c] <== Transport, Extracellular              |
| HXANTx   | 0     | 3.3   | 3.3   | 0     | 11.81 | 11.81 | 3.5795 | hypoxanthine hxan[c] --> hx Transport, Peroxisomal              |
| ILEtec   | 0     | 1     | 1     | ##### | 0.568 | 5E+05 | 500001 | L-isoleucine t ile-L[e] <==> i Transport, Extracellular         |
| IMPC     | -2    | 0     | 2     | -10.5 | 0     | 10.51 | 5.2563 | IMP cyclohyd [c] : h2o + im IMP Biosynthesis                    |
| MCITS    | 0     | 2     | 2     | 0     | 3     | 3     | 1.5    | 2-methylcitra [c] : h2o + oa. Propanoate Metabolism             |
| MEOHt2   | -2    | 0     | 2     | -3    | 0     | 3     | 1.5    | Methanol difi meoh[e] <==> Transport, Extracellular             |
| METAT    | 0     | 2     | 2     | 0     | 3     | 3     | 1.5    | methionine a [c] : atp + h2c Methionine Metabolism              |
| MTHFC    | -1.3  | 2     | 3.3   | -5    | 20.36 | 25.36 | 7.6843 | methenyltetr [c] : h2o + me Folate Metabolism                   |
| MTHFD    | -1.3  | 0     | 1.3   | -7    | 18.53 | 25.53 | 19.635 | methylenetet [c] : mlthf + n Folate Metabolism                  |
| NDPK4    | 0     | 1.3   | 1.3   | 0     | 15.67 | 15.67 | 12.051 | nucleoside-di [c] : atp + dtd Nucleotides                       |
| NRPPHRtu | ##### | 388.4 | 5E+05 | 0     | 389.6 | 389.6 | 0.0008 | Norepinephri nrpphr[e] <== Transport, Extracellular             |
| NTD8     | 0     | 4.6   | 4.6   | 0     | 16.46 | 16.46 | 3.5779 | 5'-nucleotida [c] : dgmp + f Nucleotides                        |
| OBDHc    | 0     | 2     | 2     | 0     | 3     | 3     | 1.5    | 2-Oxobutano [c] : 2obut + c Gly, Ser, Thr Metabolism            |
| OCOAT1m  | -221  | 289.9 | 511.3 | -223  | 150.4 | 373.4 | 0.7301 | 3-oxoacid Co. [m] : acac + s Val, Leu, ileu Metabolism          |
| Pit2m_2  | ##### | 540   | 5E+05 | -236  | 542   | 777.9 | 0.0016 | Pit2m_2 (2) h[c] + pi[c] Oxidative Phosphorylation              |
| Pit9     | -3    | 24.83 | 27.83 | -3    | 54.19 | 57.19 | 2.0554 | phosphate tr: (2) na1[e] + p Transport, Extracellular           |
| PRAGSr   | 0     | 2     | 2     | 0     | 10.51 | 10.51 | 5.2563 | phosphoribo: [c] : atp + gly IMP Biosynthesis                   |
| PRAIS    | 0     | 2     | 2     | 0     | 10.51 | 10.51 | 5.2563 | phosphoribo: [c] : atp + fpr: IMP Biosynthesis                  |
| PRASCS   | 0     | 2     | 2     | 0     | 10.51 | 10.51 | 5.2563 | phosphoribo: [c] : 5aizc + a: IMP Biosynthesis                  |
| PRFGS    | 0     | 2     | 2     | 0     | 10.51 | 10.51 | 5.2563 | phosphoribo: [c] : atp + fga IMP Biosynthesis                   |
| PSDm_hs  | 0     | 1     | 1     | 0     | 5.5   | 5.5   | 5.5    | Phosphatidyl: [m] : h + ps_f Glycerophospholipid Met.           |
| PSFLIPm  | 0     | 1     | 1     | 0     | 5.5   | 5.5   | 5.5    | phosphatidyl: atp[c] + h2o[ <i>c</i> ] Transport, Mitochondrial |
| PYNP2r   | 0     | 1.3   | 1.3   | 0     | 47.29 | 47.29 | 36.378 | pyrimidine-n1 [c] : pi + uri <= Pyrimidine Catabolism           |
| RNDR2    | 0     | 0.15  | 0.15  | 0     | 9.45  | 9.45  | 63     | ribonucleosid [c] : gdp + trd Nucleotides                       |
| SADT     | 0     | 1     | 1     | 0     | 2     | 2     | 2      | sulfate adeny [c] : atp + h + Nucleotides                       |
| SERPT    | 0     | 1     | 1     | 0     | 37.54 | 37.54 | 37.536 | serine C-palr [c] : h + pmtc Sphingolipid Metabolism            |
| SFGTH    | -1    | 1     | 2     | -1    | 2     | 3     | 1.5    | S-Formylglut: [c] : Sfglutth - Tyrosine metabolism              |
| SGPL12r  | 0     | 1     | 1     | 0     | 37.31 | 37.31 | 37.309 | Sphingosine-: [r] : h2o + spl Sphingolipid Metabolism           |
| SLCBK1   | 0     | 1     | 1     | 0     | 9.255 | 9.255 | 9.2546 | sphingolipid l [c] : atp + sph Sphingolipid Metabolism          |
| SMPD4    | 0     | 1     | 1     | 0     | 37.31 | 37.31 | 37.309 | sphingomyeli [c] : h2o + spr Sphingolipid Metabolism            |
| SMS      | 0     | 1     | 1     | 0     | 37.31 | 37.31 | 37.309 | Sphingomyeli [c] : crm_hs + Sphingolipid Metabolism             |
| SPC_HSt  | 0     | 1     | 1     | 0     | 1.333 | 1.333 | 1.3333 | sphingosylph spc_hs[c] <== Transport, Extracellular             |
| SPH1Pte  | 0     | 1     | 1     | 0     | 9.255 | 9.255 | 9.2546 | sph1p transp sph1p[c] <==> Transport, Extracellular             |
| SPHK21c  | 0     | 1     | 1     | 0     | 37.31 | 37.31 | 37.309 | sphingosine k [c] : atp + sph Sphingolipid Metabolism           |
| SPHMDAc  | 0     | 1     | 1     | 0     | 37.31 | 37.31 | 37.309 | sphingomyeli [c] : h2o + spl Sphingolipid Metabolism            |
| SPHS1Pte | 0     | 1     | 1     | 0     | 9.09  | 9.09  | 9.0903 | sphingosine-1 sphs1p[c] <== Transport, Extracellular            |
| SPHS1Ptr | 0     | 1     | 1     | 0     | 37.31 | 37.31 | 37.309 | sphingosine-1 sphs1p[c] <== Transport, ER                       |
| TMDPP    | 0     | 1.3   | 1.3   | 0     | 27.65 | 27.65 | 21.268 | thymidine ph [c] : pi + thyr Pyrimidine Catabolism              |
| TMDS     | 0     | 1.3   | 1.3   | 0     | 27.65 | 27.65 | 21.268 | thymidylate s [c] : dump + r Nucleotides                        |
| TYMSft   | 0     | 1     | 1     | 0     | 2     | 2     | 2      | Tyramine O-s tymsf[c] --> t Transport, Extracellular            |
| TYMSULT  | 0     | 1     | 1     | 0     | 2     | 2     | 2      | Tyramine Suli [c] : paps + ty Tyrosine metabolism               |
| TYRCBOX  | 0     | 1     | 1     | 0     | 2     | 2     | 2      | L-Tyrosine ca [c] : h + tyr-L Tyrosine metabolism               |
| TYROXDAC | 0     | 1     | 1     | 0     | 2     | 2     | 2      | Tyramine:oxy [c] : h2o + o2 Tyrosine metabolism                 |
| UPPN     | 0     | 1.3   | 1.3   | 0     | 47.17 | 47.17 | 36.287 | b-ureidoprop [c] : cala + (2) Pyrimidine Catabolism             |
| URATet   | 0     | 3.3   | 3.3   | 0     | 11.81 | 11.81 | 3.5795 | urate export urate[c] --> u Transport, Extracellular            |
| URATetx  | 0     | 3.3   | 3.3   | 0     | 11.81 | 11.81 | 3.5795 | urate export urate[x] --> u Transport, Peroxisomal              |
| URit     | -0.15 | 1.15  | 1.3   | -18.9 | 1.15  | 20.03 | 15.404 | uridine facilit uri[e] <==> ur Transport, Extracellular         |

|        |   |      |      |       |       |       |        |                              |                          |
|--------|---|------|------|-------|-------|-------|--------|------------------------------|--------------------------|
| VALtec | 0 | 1    | 1    | ##### | 0.73  | 5E+05 | 500001 | L-valine trans val-L[e] <==> | Transport, Extracellular |
| XANTx  | 0 | 0.15 | 0.15 | 0     | 11.81 | 11.81 | 78.75  | xanthine diff xan[c] --> xan | Transport, Peroxisomal   |
| XAO2x  | 0 | 3.3  | 3.3  | 0     | 11.81 | 11.81 | 3.5795 | xanthine oxid [x] : h2o + hx | Purine Catabolism        |
| XAOx   | 0 | 3.3  | 3.3  | 0     | 11.81 | 11.81 | 3.5795 | xanthine oxi [x] : h2o + o2  | Purine Catabolism        |

MULTISPECIFIC DRUG TRANSPORTER Slc22a8 (Oat3) REGULATES MULTIPLE METABOLIC PATHWAYS.

Wei Wu, Neema Jamshidi, Satish A. Eraly, Henry C. Liu, Kevin T. Bush, Bernhard O. Palsson and Sanjay K. Nigam.

DRUG METABOLISM AND DISPOSITION.
