# Supplementary material
Source: PubMed Central journal article supplement (PMC3781372)
Supplement: supp_113.052647_Supplementary_tables_4_52647.pdf [file supp_113.052647_Supplementary_tables_4_52647.pdf]

Supplemental Table 4. Core\_differences

|              |    |                                                                       |
|--------------|----|-----------------------------------------------------------------------|
| AHCYStr      | KO | S-Adenosylahcys[c] <= Transport, Endoplasmic Reticular                |
| AMETr        | KO | S-Adenosylamet[c] <= Transport, Endoplasmic Reticular                 |
| AMETt2m      | KO | S-Adenosylahcys[m] + Transport, Mitochondrial                         |
| ARGt4        | KO | L-arginine t arg-L[e] + r Transport, Extracellular                    |
| BTNt3i       | KO | Biotin tran atp[c] + bt Transport, Extracellular                      |
| CYSt4        | KO | L-cysteine cys-L[e] + r Transport, Extracellular                      |
| CYTDn        | KO | cytidine de [n] : cytd + Nucleotides                                  |
| CYTDtn       | KO | cytidine tr cytd[c] <== Transport, Nuclear                            |
| ILEt4        | KO | L-isoleucin ile-L[e] + n Transport, Extracellular                     |
| PCFLOPm      | KO | phosphatic atp[c] + h2 Transport, Mitochondrial                       |
| PETOHMm_hs   | KO | phosphatic [m] : (3) an Glycerophospholipid Metabolism                |
| PETOHMr_hs   | KO | phosphatic [r] : (3) am Glycerophospholipid Metabolism                |
| Uritn        | KO | uridine tra uri[c] <==> Transport, Nuclear                            |
| VALt4        | KO | L-valine tra na1[e] + v Transport, Extracellular                      |
| 3MOPt2im     | WT | 3-Methyl-23mop[c] + Transport, Mitochondrial                          |
| 4PYRDX       | WT | 4-Pyridoxa 4pyrdx[c] + Transport, Extracellular                       |
| ARACHDt2     | WT | fatty acid t arachd[e] < Transport, Extracellular                     |
| ARACHt       | WT | fatty acid t arach[e] <= Transport, Extracellular                     |
| CHOLATe2     | WT | cholate tra cholate[e] Transport, Extracellular                       |
| CHOLATe3     | WT | ABC bile ac atp[c] + ch Transport, Extracellular                      |
| DOPAt4(2)r   | WT | Dopamine dopa[e] + ( Transport, Extracellular                         |
| EX_4pyrdx(e) | WT | 4-Pyridoxate Demand Transport, Extracellular                          |
| FATP4t       | WT | fatty acid e arach[c] + i Transport, Extracellular                    |
| FATP5t       | WT | fatty acid e arachd[c] + i Transport, Extracellular                   |
| HMGCOASim    | WT | Hydroxym [m] : aaco Cholesterol Metabolism                            |
| ILETA        | WT | isoleucine [c] : ak g + i Valine, Leucine, and Isoleucine Metabolism  |
| NRPPHRt4(2)r | WT | Norepinep (2) na1[e] - Transport, Extracellular                       |
| PYDXDH       | WT | pyridoxal d [c] : h2o + i Vitamin B6 Metabolism                       |
| TCHOLAt      | WT | taurochola hco3[c] + t Transport, Extracellular                       |
| TCHOLAt3     | WT | ABC bile ac atp[c] + h2 Transport, Extracellular                      |
| VALTA        | WT | valine tran [c] : ak g + i Valine, Leucine, and Isoleucine Metabolism |
| sink_3mob(c) | WT | 3-Methyl-2-oxobutan Transport, Extracellular                          |
| sink_3mop    | WT | (S)-3-Methyl-2-oxopei Transport, Extracellular                        |

MULTISPECIFIC DRUG TRANSPORTER Slc22a8 (Oat3) REGULATES MULTIPLE METABOLIC PATHWAYS.

Wei Wu, Neema Jamshidi, Satish A. Eraly, Henry C. Liu, Kevin T. Bush, Bernhard O. Palsson and Sanjay K. Nigam.  
DRUG METABOLISM AND DISPOSITION.
